# Supplementary material
Source: Springer Nature journal article supplement (https://www.springermedizin.de/resource/supplementary/12943_2013_1229_MOESM4_ESM.pdf/9553080)
Supplement: MOESM4 [file 9553080]

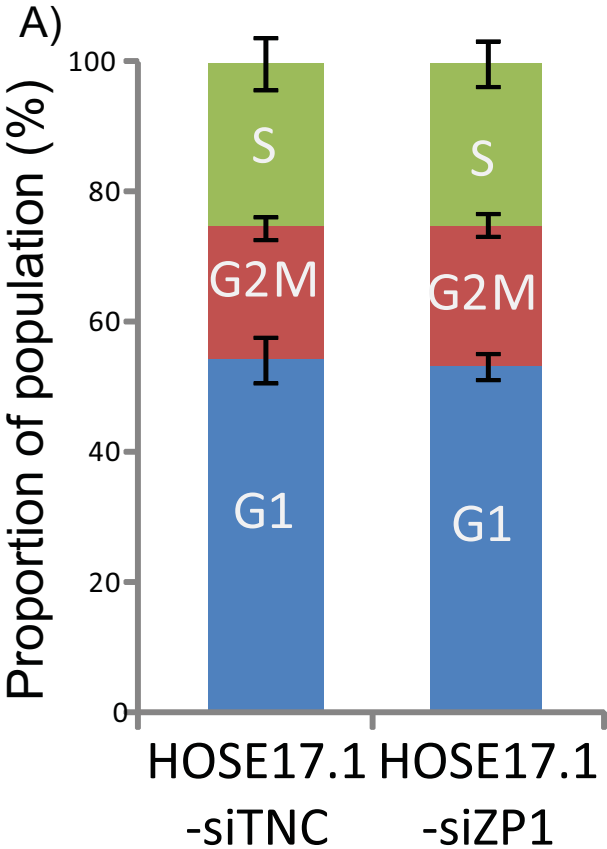

**Supplementary Figure 3**
